# Supplementary material for: Changing biosynthesis of terpenoid percursors in rice through synthetic biology
Source: Frontiers journal article supplement (doi:10.3389/fpls.2023.1133299), 2023-07-03
Supplement: Data_Sheet_2.ZIP [file Data_Sheet_2.ZIP]

## Sheet: Relative Gene Expression
Line	Mutant Type					MEP Pathway (Plastid)								Line							MVA Pathway (Cytoplasm)							Line			exogenous MVA pathway (Plastid)
		CMK	MCT	MDS	DXR	HDR2	HDR1	IPPI2	IPPI1	DXS3	DXS2	DXS1	HDS		HMGR1	HMGR2	HMGR3	MK1	MK2	MK3	PMK1	PMK2	MVD1	MVD2	HMGS1	HMGS2	HMGS3		HMGS	HMGR	CrMK	PMK	MVD	WR1
WT		1	1	1	1	1	1	1	1	1	1	1	1	WT	1	1	1	1	1	1	1	1	1	1	1	1	1	WT	NP	NP	NP	NP	NP	NP
L.30	I	0.969	0.788	0.226	0.097	0.923	0.287	0.162	0.069	0.988	1.097	0.694	0.087	L.30	0.877	1.897	1.107	0.995	0.992	0.966	1.163	1.374	1.315	0.831	1.677	1.193	1.761	L.30	NP	1.7	NP	NP	NP	NP
L.32	I	0.444	0.442	0.614	0.115	0.08	0.261	0.202	0.454	0.743	0.535	0.133	0.355	L.32	1.322	1.011	2.158	4.089	1.218	1.243	3.444	2.846	7.749	2.011	4.812	1.202	1.697	L.32	NP	1.7	NP	NP	NP	NP
L.34	I	0.377	0.597	0.479	0.897	0.908	0.531	0.158	0.135	0.261	0.235	0.783	0.154	L.34	2.345	1.499	1.857	2.049	1.017	0.899	0.504	1.147	0.586	1.719	0.501	0.766	1.767	L.34	NP	1	NP	NP	NP	NP
L.35	I	0.197	0.512	0.155	0.21	0.389	0.269	0.305	0.213	0.244	0.252	0.917	0.25	L.35	5.623	4.153	3.14	5.415	0.557	1.595	3.878	3.631	2.134	3.852	3.193	1.462	2.253	L.35	NP	2	NP	NP	NP	NP
L.36	I	0.261	0.311	0.113	0.03	0.386	0.195	1.039	0.143	0.614	0.401	0.481	0.502	L.36	3.764	2.586	3.558	4.519	1.119	2.213	2.379	2.353	1.26	0.973	5.874	0.969	3.172	L.36	NP	4	NP	NP	NP	NP
L.37	I	0.332	0.623	0.368	0.286	0.714	0.555	0.403	0.26	0.39	0.461	0.509	0.067	L.37	1.571	2.682	3.434	7.226	1.535	1.842	2.942	5.898	3.123	0.559	2.308	2.632	2.786	L.37	NP	4.3	NP	NP	NP	NP
L.38	I	0.157	0.188	0.194	0.721	0.672	0.561	0.466	0.216	0.412	0.398	0.114	0.097	L.38	3.742	4.257	5.784	3.877	3.63	3.106	2.226	1.368	1.353	1.599	2.881	4.085	6.108	L.38	NP	6.7	NP	NP	NP	NP
L.39	I	0.574	0.524	0.098	0.098	0.872	0.07	0.669	0.088	0.972	1.114	1.796	0.208	L.39	1.09	2.723	5.712	1.022	1.023	0.903	7.523	1.232	0.613	0.813	1.112	2.993	2.153	L.39	NP	3.7	NP	NP	NP	NP
L.40	I	0.551	0.332	0.171	0.101	0.388	0.164	0.314	0.572	0.778	0.135	0.167	0.298	L.40	3.004	0.88	1.763	1.513	1.312	0.639	0.933	0.402	0.425	2.443	0.869	0.422	2.275	L.40	NP	1.7	NP	NP	NP	NP
L.41	I	0.687	1.641	0.654	0.482	1.121	0.341	1.385	0.861	1.351	1.519	1.367	0.553	L.41	2.927	1.718	1.922	1.646	2.535	2.771	0.978	1.697	1.114	1.811	2.141	1.418	3.059	L.41	NP	5.7	NP	NP	NP	NP
L.42	I	0.798	0.314	0.127	0.087	1.562	0.267	0.453	0.093	0.935	1.968	1.245	0.019	L.42	1.208	1.714	2.567	1.191	3.182	1.833	1.214	3.946	1.103	0.956	2.371	1.236	1.866	L.42	NP	17.2	NP	NP	NP	NP
L.44	I	0.377	0.874	0.432	0.561	0.796	0.652	0.714	0.549	1.465	1.032	1.989	0.642	L.44	1.268	1.331	3.473	3.783	0.55	2.097	0.787	1.039	1.036	0.498	0.532	1.604	1.855	L.44	NP	13.7	NP	NP	NP	NP
L.2	II	2.857	0.075	0.237	0.098	0.185	0.314	0.717	0.211	0.243	0.844	2.003	0.113	L.2	0.586	1.112	0.944	1.039	0.822	0.974	0.526	0.633	0.816	1.108	0.799	0.918	0.522	L.2	1.7	3.3	3	NP	NP	NP
L.3	II	0.603	0.659	0.067	1.91	1.75	0.282	0.314	0.512	0.133	0.517	0.698	0.187	L.3	2.574	4.418	3.744	4.761	1.191	1.314	2.855	3.556	3.698	1.41	3.019	2.571	4.878	L.3	0.7	8.3	2.3	NP	NP	NP
L.4	II	0.944	0.247	0.798	0.175	0.882	0.733	1.769	0.586	1.597	0.943	1.926	0.148	L.4	0.987	1.543	1.748	0.987	0.714	0.927	1.197	1.273	1.216	0.739	2.715	4.475	3.155	L.4	2.1	4	4	NP	NP	NP
L.5	II	0.592	0.109	0.112	0.113	0.219	0.441	0.587	0.577	0.459	1.359	0.115	0.169	L.5	1.887	0.998	1.535	0.978	1.308	1.065	0.854	1.148	0.831	1.244	1.149	1.809	0.836	L.5	2.7	6	5	NP	NP	NP
L.6	II	0.816	0.358	0.195	0.179	0.425	0.618	0.773	0.115	0.287	0.275	0.792	0.223	L.6	1.878	0.911	1.321	0.988	1.027	1.097	1.672	1.996	1.022	1.193	1.194	1.066	0.756	L.6	3.4	7	2.7	NP	NP	NP
L.7	II	0.211	0.438	0.418	0.119	0.876	1.477	0.288	0.571	0.097	0.545	1.507	0.559	L.7	6.749	4.396	1.135	2.811	1.841	1.363	0.569	2.31	1.437	0.896	0.792	4.143	0.915	L.7	1.3	9	9	NP	NP	NP
L.8	II	1.398	0.261	0.101	0.468	1.094	0.166	1.056	0.276	0.573	0.202	1.794	0.155	L.8	0.811	0.889	0.778	0.781	2.016	1.106	0.716	1.624	1.568	1.251	0.926	0.832	2.077	L.8	6.7	11	8	NP	NP	NP
L.9	II	0.212	0.078	0.435	0.039	0.911	0.156	1.541	0.285	0.389	0.487	0.236	0.066	L.9	0.899	2.259	6.705	1.766	0.477	2.137	1.142	0.598	0.477	0.739	1.422	1.124	4.738	L.9	5.7	8.3	0.7	NP	NP	NP
L.10	II	0.931	0.695	0.342	0.516	0.941	0.357	1.024	0.765	0.815	1.814	1.376	0.084	L.10	0.957	5.127	3.172	1.312	0.964	1.488	1.711	5.186	1.839	0.897	2.822	1.986	4.967	L.10	1.7	4.3	1	NP	NP	NP
L.11	II	0.219	0.371	0.267	0.148	0.227	0.197	0.182	0.211	0.139	0.572	0.417	0.972	L.11	4.421	1.004	4.387	5.673	1.316	1.028	1.281	1.113	1.492	3.359	4.748	1.133	1.302	L.11	9.7	13.7	1.7	NP	NP	NP
L.12	III	0.962	2.618	0.036	0.587	0.614	0.152	1.157	2.857	1.879	0.519	4.241	0.016	L.12	2.174	2.417	3.194	3.147	1.336	1.125	1.398	1.766	0.796	2.314	1.128	2.157	1.836	L.12	1.03	12.5	7.91	43.12	3.37	3.21
L.13	III	2.234	3.546	0.467	0.317	0.578	0.824	1.036	3.587	2.658	0.866	2.569	0.259	L.13	4.408	3.467	2.939	3.353	2.128	1.198	1.905	1.782	0.524	4.941	5.711	1.171	1.231	L.13	1.74	1.25	6.38	11.09	5.48	5.58
L.14	III	0.577	2.241	0.512	0.299	0.688	0.186	2.473	0.072	0.234	1.405	2.249	0.125	L.14	4.123	2.584	1.985	1.266	0.885	2.807	2.953	1.141	0.997	1.533	1.384	1.212	1.287	L.14	0.97	1	0.62	0.88	0.38	0.32
L.15	III	0.694	0.566	0.255	0.119	0.894	0.631	0.825	0.092	0.414	0.545	0.698	0.349	L.15	3.481	5.666	4.441	1.547	2.688	2.215	3.879	4.352	4.32	3.992	2.278	2.857	2.458	L.15	1.2747	1.8257	2.687	2.326	4.058	4.058
L.17	III	0.197	1.872	0.017	0.187	0.794	0.095	1.597	0.415	0.63	1.213	1.735	0.061	L.17	1.784	2.627	1.019	1.971	3.992	2.201	1.589	1.519	0.808	1.035	8.01	1.543	6.375	L.17	1.6655	1.60767	1.2638	1.5968	1.294	1.48
L.18	III	0.975	0.342	0.744	0.051	0.182	0.098	1.747	0.316	1.597	2.223	2.844	0.049	L.18	1.103	2.137	5.425	6.213	4.246	0.868	0.988	1.102	7.898	3.557	3.456	8.148	5.121	L.18	91.8	88.76	55.36	5.65	5.65	24.63
L.19	III	0.118	0.187	0.245	0.298	0.752	0.062	0.614	0.097	0.852	0.312	0.456	0.133	L.19	5.512	3.148	2.153	5.712	1.531	2.782	3.093	1.815	9.378	2.689	1.174	1.174	1.313	L.19	4.32	4.87	10.4	25	3.05	19.46
L.20	III	0.22	0.094	0.295	0.312	0.072	0.532	0.673	0.348	0.159	0.528	0.585	0.188	L.20	2.232	1.826	1.019	1.291	1.989	0.492	1.105	1.164	1.243	1.033	9.873	1.837	2.092	L.20	10.956	10.957	4.098	10.964	6.562	8.9807
L.22	III	0.697	1.188	0.347	0.318	1.213	0.419	1.092	1.707	0.281	0.968	1.895	0.196	L.22	5.816	1.195	3.308	6.838	3.821	5.377	5.676	3.946	5.14	3.426	7.426	6.748	4.863	L.22	0.68408	3.536	5.7623	4.6215	1.82	4.794
L.24	III	0.811	0.771	0.391	0.166	2.214	0.421	0.212	0.066	0.789	0.536	0.843	0.078	L.24	1.979	3.49	1.107	1.687	0.814	1.518	1.711	4.365	1.349	3.417	1.141	2.178	1.513	L.24	5.62	3.53	4.13	26.1	3.13	2.97
L.25	III	0.241	0.443	0.219	0.039	0.584	0.098	0.492	0.487	0.163	0.348	0.882	0.195	L.25	1.481	1.436	0.927	1.973	0.796	0.961	1.082	1.901	1.213	1.396	1.062	1.472	1.101	L.25	10.6	23.18	27.62	32.12	1	14.89
L.26	III	0.691	0.283	0.863	0.101	0.797	0.125	0.829	0.294	0.683	0.867	0.567	0.257	L.26	1.281	1.427	1.944	2.004	1.981	1.984	2.427	3.649	1.305	2.773	0.986	1.366	2.513	L.26	0.82	5.72	12.15	21.1	4.15	0.2

## Sheet: Absolute gene expression
Lines	Type	HMGS1	HMGS2	HMGS3	HMGR1	HMGR2	HMGR3	MK1	MK2	MK3	PMK1	PMK2	MVD1	MVD2	DXS1	DXS2	DXS3	DXR	CMS/MDS	CMK	MCS/MCT	HDS	IDS1/HDR1	IDS2/HDR2	IDI1/IPPI1	IDI2/IPPI2	AthHMGS	AthHMGR	CrMVK	exPMK	MVD
WT	WT	0.414711	0.493333	0.432342	0.823549	0.697465	0.234141	1.20754	0.188906	0.599012	1.89607	1.40627	1.31538	1.01248	0.947574	0.741692	0.450428	0.298882	0.725634	0.419218	0.272279	0.44789	0.415786	1.09875	1.1946	0.380156	NP	NP	NP	NP	NP
L2	Early MVA	0.799	0.918	0.522	0.586	1.112	0.944	1.039	0.822	0.974	0.526	0.633	0.816	1.108	2.003	0.844	0.243	0.098	0.075	2.857	0.237	0.113	0.314	0.185	0.211	0.717	1.7	3.3	3	NP	NP
L3	Early MVA	3.019	2.571	4.878	2.574	4.418	3.744	4.761	1.191	1.314	2.855	3.556	3.698	1.41	0.698	0.517	0.133	1.91	0.067	0.603	0.659	0.187	0.282	1.75	0.512	0.314	0.7	8.3	2.3	NP	NP
L4	Early MVA	2.715	4.475	3.155	0.987	1.543	1.748	0.987	0.714	0.927	1.197	1.273	1.216	0.739	1.926	0.943	1.597	0.175	0.798	0.944	0.247	0.148	0.733	0.882	0.586	1.769	2.1	4	4	NP	NP
L5	Early MVA	1.149	1.809	0.836	1.887	0.998	1.535	0.978	1.308	1.065	0.854	1.148	0.831	1.244	0.115	1.359	0.459	0.113	0.112	0.592	0.109	0.169	0.441	0.219	0.577	0.587	2.7	6	5	NP	NP
L6	Early MVA	1.194	1.066	0.756	1.878	0.911	1.321	0.988	1.027	1.097	1.672	1.996	1.022	1.193	0.792	0.275	0.287	0.179	0.195	0.816	0.358	0.223	0.618	0.425	0.115	0.773	3.4	7	2.7	NP	NP
L7	Early MVA	0.792	4.143	0.915	6.749	4.396	1.135	2.811	1.841	1.363	0.569	2.31	1.437	0.896	1.507	0.545	0.097	0.119	0.418	0.211	0.438	0.559	1.477	0.876	0.571	0.288	1.3	9	9	NP	NP
L8	Early MVA	0.926	0.832	2.077	0.811	0.889	0.778	0.781	2.016	1.106	0.716	1.624	1.568	1.251	1.794	0.202	0.573	0.468	0.101	1.398	0.261	0.155	0.166	1.094	0.276	1.056	6.7	11	8	NP	NP
L9	Early MVA	1.422	1.124	4.738	0.899	2.259	6.705	1.766	0.477	2.137	1.142	0.598	0.477	0.739	0.236	0.487	0.389	0.039	0.435	0.212	0.078	0.066	0.156	0.911	0.285	1.541	5.7	8.3	0.7	NP	NP
L10	Early MVA	2.822	1.986	4.967	0.957	5.127	3.172	1.312	0.964	1.488	1.711	5.186	1.839	0.897	1.376	1.814	0.815	0.516	0.342	0.931	0.695	0.084	0.357	0.941	0.765	1.024	1.7	4.3	1	NP	NP
L11	Early MVA	4.748	1.133	1.302	4.421	1.004	4.387	5.673	1.316	1.028	1.281	1.113	1.492	3.359	0.417	0.572	0.139	0.148	0.267	0.219	0.371	0.972	0.197	0.227	0.211	0.182	9.7	13.7	1.7	NP	NP
L12	Full MVA	1.128	2.157	1.836	2.174	2.417	3.194	3.147	1.336	1.125	1.398	1.766	0.796	2.314	4.241	0.519	1.879	0.587	0.036	0.962	2.618	0.016	0.152	0.614	2.857	1.157	1.03	12.5	7.91	43.12	3.37
L13	Full MVA	5.711	1.171	1.231	4.408	3.467	2.939	3.353	2.128	1.198	1.905	1.782	0.524	4.941	2.569	0.866	2.658	0.317	0.467	2.234	3.546	0.259	0.824	0.578	1.036	3.587	1.74	1.25	6.38	11.09	5.48
L14	Full MVA	1.384	1.212	1.287	4.123	2.584	1.985	1.266	0.885	2.807	2.953	1.141	0.997	1.533	2.249	1.405	0.234	0.299	0.512	0.577	2.241	0.125	0.186	0.688	0.072	2.473	0.97	1	0.62	0.88	0.38
L15	Full MVA	2.278	2.857	2.458	3.481	5.666	4.441	1.547	2.688	2.215	3.879	4.352	4.32	3.992	0.698	0.545	0.414	0.119	0.255	0.694	0.566	0.349	0.631	0.894	0.092	0.825	1.2747	1.8257	2.687	2.326	4.058
L17	Full MVA	8.01	1.543	6.375	1.784	2.627	1.019	1.971	3.992	2.201	1.589	1.519	0.808	1.035	1.735	1.213	0.63	0.187	0.017	0.197	1.872	0.061	0.095	0.794	0.415	1.597	1.6655	1.60767	1.2638	1.5968	1.294
L18	Full MVA	3.456	8.148	5.121	1.103	2.137	5.425	6.213	4.246	0.868	0.988	1.102	7.898	3.557	2.844	2.223	1.597	0.051	0.744	0.975	0.342	0.049	0.098	0.182	0.316	1.747	91.8	88.76	55.36	5.65	5.65
L19	Full MVA	1.174	1.174	1.313	5.512	3.148	2.153	5.712	1.531	2.782	3.093	1.815	9.378	2.689	0.456	0.312	0.852	0.298	0.245	0.118	0.187	0.133	0.062	0.752	0.097	0.614	4.32	4.87	10.4	25	3.05
L20	Full MVA	9.873	1.837	2.092	2.232	1.826	1.019	1.291	1.989	0.492	1.105	1.164	1.243	1.033	0.585	0.528	0.159	0.312	0.295	0.22	0.094	0.188	0.532	0.072	0.348	0.673	10.956	10.957	4.098	10.964	6.562
L22	Full MVA	7.426	6.748	4.863	5.816	1.195	3.308	6.838	3.821	5.377	5.676	3.946	5.14	3.426	1.895	0.968	0.281	0.318	0.347	0.697	1.188	0.196	0.419	1.213	1.707	1.092	0.68408	3.536	5.7623	4.6215	1.82
L24	Full MVA	1.141	2.178	1.513	1.979	3.49	1.107	1.687	0.814	1.518	1.711	4.365	1.349	3.417	0.843	0.536	0.789	0.166	0.391	0.811	0.771	0.078	0.421	2.214	0.066	0.212	5.62	3.53	4.13	26.1	3.13
L25	Full MVA	1.062	1.472	1.101	1.481	1.436	0.927	1.973	0.796	0.961	1.082	1.901	1.213	1.396	0.882	0.348	0.163	0.039	0.219	0.241	0.443	0.195	0.098	0.584	0.487	0.492	10.6	23.18	27.62	32.12	1
L26	Full MVA	0.986	1.366	2.513	1.281	1.427	1.944	2.004	1.981	1.984	2.427	3.649	1.305	2.773	0.567	0.867	0.683	0.101	0.863	0.691	0.283	0.257	0.125	0.797	0.294	0.829	0.82	5.72	12.15	21.1	4.15
L30	HMGR	1.677	1.193	1.761	0.877	1.897	1.107	0.995	0.992	0.966	1.163	1.374	1.315	0.831	0.694	1.097	0.988	0.097	0.226	0.969	0.788	0.087	0.287	0.923	0.069	0.162	NP	1.7	NP	NP	NP
L32	HMGR	4.812	1.202	1.697	1.322	1.011	2.158	4.089	1.218	1.243	3.444	2.846	7.749	2.011	0.133	0.535	0.743	0.115	0.614	0.444	0.442	0.355	0.261	0.08	0.454	0.202	NP	1.7	NP	NP	NP
L34	HMGR	0.501	0.766	1.767	2.345	1.499	1.857	2.049	1.017	0.899	0.504	1.147	0.586	1.719	0.783	0.235	0.261	0.897	0.479	0.377	0.597	0.154	0.531	0.908	0.135	0.158	NP	1	NP	NP	NP
L35	HMGR	3.193	1.462	2.253	5.623	4.153	3.14	5.415	0.557	1.595	3.878	3.631	2.134	3.852	0.917	0.252	0.244	0.21	0.155	0.197	0.512	0.25	0.269	0.389	0.213	0.305	NP	2	NP	NP	NP
L36	HMGR	5.874	0.969	3.172	3.764	2.586	3.558	4.519	1.119	2.213	2.379	2.353	1.26	0.973	0.481	0.401	0.614	0.03	0.113	0.261	0.311	0.502	0.195	0.386	0.143	1.039	NP	4	NP	NP	NP
L37	HMGR	2.308	2.632	2.786	1.571	2.682	3.434	7.226	1.535	1.842	2.942	5.898	3.123	0.559	0.509	0.461	0.39	0.286	0.368	0.332	0.623	0.067	0.555	0.714	0.26	0.403	NP	4.3	NP	NP	NP
L38	HMGR	2.881	4.085	6.108	3.742	4.257	5.784	3.877	3.63	3.106	2.226	1.368	1.353	1.599	0.114	0.398	0.412	0.721	0.194	0.157	0.188	0.097	0.561	0.672	0.216	0.466	NP	6.7	NP	NP	NP
L39	HMGR	1.112	2.993	2.153	1.09	2.723	5.712	1.022	1.023	0.903	7.523	1.232	0.613	0.813	1.796	1.114	0.972	0.098	0.098	0.574	0.524	0.208	0.07	0.872	0.088	0.669	NP	3.7	NP	NP	NP
L40	HMGR	0.869	0.422	2.275	3.004	0.88	1.763	1.513	1.312	0.639	0.933	0.402	0.425	2.443	0.167	0.135	0.778	0.101	0.171	0.551	0.332	0.298	0.164	0.388	0.572	0.314	NP	1.7	NP	NP	NP
L41	HMGR	2.141	1.418	3.059	2.927	1.718	1.922	1.646	2.535	2.771	0.978	1.697	1.114	1.811	1.367	1.519	1.351	0.482	0.654	0.687	1.641	0.553	0.341	1.121	0.861	1.385	NP	5.7	NP	NP	NP
L42	HMGR	2.371	1.236	1.866	1.208	1.714	2.567	1.191	3.182	1.833	1.214	3.946	1.103	0.956	1.245	1.968	0.935	0.087	0.127	0.798	0.314	0.019	0.267	1.562	0.093	0.453	NP	17.2	NP	NP	NP
L44	HMGR	0.532	1.604	1.855	1.268	1.331	3.473	3.783	0.55	2.097	0.787	1.039	1.036	0.498	1.989	1.032	1.465	0.561	0.432	0.377	0.874	0.642	0.652	0.796	0.549	0.714	NP	13.7	NP	NP	NP

## Sheet: Hormone determinations
Lines	Type	ACC	tZ	ZR	iP	GA1	GA3	GA4	IAA	ABA	JA	SA				Lines	Type	ACC	tZ	ZR	iP	GA1	GA3	GA4	IAA	ABA	JA	SA
WT	WT	100	100	100	100	100	100	100	100	100	100	100				WT	WT	1200.25	612.513	19.7163	1.78561	0.484787	0.0246414	0.0442135	5.12428	12.3119	682.811	9662.34
L30	I	0	107.556	18.1886	13.1452	80.6857	0	2941.61	0	94.4796	45.8217	70.0414				L30	I	0	658.793	3.58612	0.234723	0.391154	0	1.30059	0	11.6322	312.876	6767.64
L32	I	8.28219	95.5759	20.632	18.2308	53.8264	0	3003.33	3.01392	60.3155	20.7663	69.0416				L32	I	99.4069	585.415	4.06788	0.32553	0.260943	0	1.32788	0.154442	7.42599	141.795	6671.03
L34	I	0.603472	96.3667	0	18.5881	168.332	0	5025.4	0	93.5595	36.7441	71.7522				L34	I	7.24317	590.258	0	0.331911	0.816054	0	2.22191	0	11.519	250.893	6932.95
L35	I	0.805589	88.2712	21.8723	20.6684	74.2019	0	1787.08	2.18258	129.59	47.9994	51.7652				L35	I	9.66907	540.672	4.31241	0.369056	0.359721	0	0.79013	0.111842	15.955	327.745	5001.73
L36	I	13.2401	111.884	26.1527	128.13	51.4401	381.212	324.484	104.817	291.754	103.519	122.446				L36	I	158.914	685.303	5.15636	2.28791	0.249375	0.0939361	0.143466	5.3711	35.9205	706.837	11831.2
L37	I	36.9144	118.345	12.9076	5.36864	26.0637	0	629.205	135.412	363.369	69.4655	109.199				L37	I	443.065	724.88	2.54491	0.0958631	0.126354	0	0.278194	6.9389	44.7377	474.318	10551.2
L38	I	11.2823	101.74	37.8946	27.2251	22.8784	0	3754.57	296.505	305.071	70.0949	129.289				L38	I	135.416	623.17	7.47143	0.486134	0.110911	0	1.66003	15.1937	37.5601	478.616	12492.3
L39	I	0.893245	121.055	0	14.6004	170.081	0	927.344	0	128.275	74.192	84.9028				L39	I	10.7212	741.476	0	0.260706	0.824529	0	0.410011	0	15.793	506.591	8203.6
L40	I	5.328	104.363	33.6874	31.8596	41.2747	0	1813.01	352.506	319.314	68.504	127.143				L40	I	63.9493	639.238	6.64193	0.568889	0.200094	0	0.801596	18.0634	39.3136	467.753	12285
L41	I	41.0183	97.3439	18.3015	38.2256	24.5823	0	2650.92	211.892	225.062	42.8824	110.995				L41	I	492.322	596.243	3.60838	0.68256	0.119172	0	1.17206	10.858	27.7094	292.806	10724.7
L42	I	81.5482	99.7433	31.4829	12.5589	24.4384	1734.96	2871.48	61.321	200.376	40.0346	114.329				L42	I	978.782	610.94	6.20727	0.224253	0.118474	0.427519	1.26958	3.14226	24.6701	273.361	11046.9
L44	I	23.4999	86.6982	0	88.0491	56.8016	0	4204.4	348.694	252.967	45.8164	129				L44	I	282.057	531.037	0	1.57221	0.275367	0	1.85891	17.868	31.1451	312.84	12464.5
L2	II	4.73388	98.2033	17.1078	7.93989	17.2622	0	2976.94	0	136.782	32.7366	59.1404				L2	II	56.8184	601.508	3.37303	0.141776	0.083685	0	1.31621	0	16.8404	223.529	5714.35
L3	II	14.2337	102.982	24.8866	21.4811	41.7113	0	7567.26	0	77.3602	81.5041	84.8168				L3	II	170.839	630.777	4.90673	0.383569	0.202211	0	3.34575	0	9.52453	556.519	8195.29
L4	II	11.6242	109.778	0	20.1221	0	543.007	2193.37	0	96.6129	53.8028	58.5604				L4	II	139.519	672.407	0	0.359303	0	0.133805	0.969768	0	11.8949	367.371	5658.31
L5	II	29.9706	83.0438	18.3261	66.6145	141.7	926.478	4700.24	84.152	204.325	112.561	106.065				L5	II	359.722	508.654	3.61323	1.18948	0.686945	0.228297	2.07814	4.31218	25.1563	768.581	10248.4
L6	II	29.0905	96.5738	22.8057	20.2788	92.0027	384.984	777.316	0	104.112	52.0492	94.7911				L6	II	349.158	591.527	4.49645	0.362101	0.446017	0.0948657	0.343679	0	12.8182	355.398	9159.05
L7	II	19.7528	95.7922	70.5889	31.7079	67.6146	563.065	328.309	79.9889	116.882	132.828	113.028				L7	II	237.083	586.739	13.9175	0.566181	0.327787	0.138747	0.145157	4.09885	14.3904	906.964	10921.2
L8	II	22.8737	95.4392	21.2384	5.68794	99.9356	206.108	4253.76	23.1331	156.635	46.1214	103.93				L8	II	274.541	584.577	4.18743	0.101564	0.484475	0.0507879	1.88074	1.1854	19.2848	314.922	10042.1
L9	II	7.06548	67.5284	34.5389	23.0412	65.9675	0	306.135	99.0931	112.054	68.8032	102.75				L9	II	84.8034	413.62	6.80981	0.411426	0.319802	0	0.135353	5.0778	13.796	469.796	9928.02
L10	II	15.7701	97.8775	0	6.87514	43.2315	261.699	3247.48	58.0623	163.966	59.8378	108.334				L10	II	189.281	599.512	0	0.122763	0.20958	0.0644863	1.43583	2.97527	20.1873	408.579	10467.6
L11	II	19.1467	93.2131	12.1916	53.6848	60.4915	640.276	399.483	25.907	114.721	55.5316	97.2137				L11	II	229.808	570.942	2.40373	0.958602	0.293255	0.157773	0.176625	1.32755	14.1243	379.176	9393.12
L12	III	72.6639	69.7681	0	86.4896	72.4416	0	73.4778	0	139.084	94.5769	104.093				L12	III	872.148	427.338	0	1.54437	0.351187	0	0.0324871	0	17.1238	645.781	10057.8
L13	III	29.4205	93.2626	0	105.386	109.984	0	86.122	0	59.679	63.908	84.9788				L13	III	353.12	571.245	0	1.88179	0.533189	0	0.0380776	0	7.34763	436.371	8210.94
L14	III	12.6775	114.82	0	96.2075	116.111	0	70.517	0	80.733	82.3122	74.5719				L14	III	152.162	703.284	0	1.71789	0.562893	0	0.0311781	0	9.93978	562.037	7205.39
L15	III	48.8338	106.69	0	101.012	28.6198	207.835	70.6468	0	137.222	111.991	90.7062				L15	III	586.127	653.487	0	1.80367	0.138745	0.0512134	0.0312355	0	16.8946	764.685	8764.35
L17	III	14.4297	104.044	0	83.545	114.806	0	93.1345	0	72.6084	81.5165	72.6588				L17	III	173.192	637.284	0	1.49179	0.556563	0	0.0411781	0	8.93948	556.604	7020.54
L18	III	163.94	71.4377	9.49541	87.8194	81.9861	0	64.3951	0	147.201	104.178	103.535				L18	III	1967.68	437.565	1.87215	1.56811	0.397458	0	0.0284714	0	18.1233	711.342	10003.9
L19	III	202.192	65.5734	8.55406	87.2508	25.2627	0	94.7576	0	109.825	65.1511	99.4286				L19	III	2426.81	401.646	1.68655	1.55796	0.12247	0	0.0418957	0	13.5216	444.859	9607.13
L20	III	54.1501	95.8585	23.1668	106.943	27.8865	0	112.814	125.464	143.778	103.574	97.2872				L20	III	649.937	587.145	4.56765	1.90958	0.13519	0	0.0498791	6.42913	17.7019	707.216	9400.22
L22	III	41.4301	115.21	5.69248	98.6707	102.454	0	934.977	0	94.6142	103.055	102.198				L22	III	497.265	705.674	1.12235	1.76187	0.496684	0	0.413386	0	11.6488	703.669	9874.68
L24	III	62.835	115.721	15.1799	94.3364	147.068	0	134.139	144.164	146.4	136.681	106.499				L24	III	754.177	708.807	2.99293	1.68448	0.712968	0	0.0593076	7.38737	18.0247	933.275	10290.3
L25	III	92.2911	114.186	0	94.4059	92.3559	516.233	77.8048	58.6008	154.189	141.606	106.679				L25	III	1107.72	699.404	0	1.68572	0.447729	0.127207	0.0344003	3.00287	18.9837	966.904	10307.7
L26	III	69.3312	119.669	0	100.384	53.1056	275.719	71.1963	89.2315	123.794	85.4433	102.163				L26	III	832.148	732.987	0	1.79247	0.257449	0.0679411	0.0314784	4.57247	15.2414	583.416	9871.36

## Sheet: Phenotype measurements
Lines	Type	Height	Leafs	Leaf length	Leafwdith	Surface	Chlorophyl					Height	sd	Leafs	sd	Leaf length	sd	Leafwdith	sd	Surface	sd	Chlorophyl	sd
WT	WT	82.1	5.6	52.5	0.96	38.0325	35.93				WT	82.1		5.6		52.5		0.96		38.0325		35.93
L2	II	70	4	35	0.6	15.75	39.1				I	52.4167	6.08214	4.08333	0.792961	31.25	3.66494	0.575	0.121543	13.6406	4.01131	31.6833	1.96923
L3	II	65	4	50	1	37.5	37				II	65.7	4.47338	4.3	0.483046	44.9	5.08702	0.785	0.124833	26.7863	6.83045	38.84	1.30316
L4	II	71	4	48	0.9	32.4	37.8				III	80.9167	5.08935	5.58333	0.514929	53.5833	3.31548	0.95	0.06742	38.2875	4.67801	36.05	2.39222
L5	II	63	5	43	0.8	25.8	40.9
L6	II	58	5	43	0.7	22.575	39.2
L7	II	60	4	44	0.8	26.4	39.7
L8	II	71	5	45	0.65	21.9375	37.1
L9	II	68	4	40	0.7	21	38.2
L10	II	65	4	49	0.8	29.4	39.1
L11	II	66	4	52	0.9	35.1	40.3
L12	III	80	6	50	0.9	33.75	34.9
L13	III	77	5	51	0.9	34.425	41.2
L14	III	77	5	52	0.8	31.2	32.9
L15	III	78	6	50	0.9	33.75	35.7										Type	Height	Leaf length	Surface	Chlorophyl	Leafs	Leafwdith
L17	III	79	5	55	1	41.25	35.6										WT	82.1	52.5	38.0325	35.93	5.6	0.96
L18	III	83	6	58	1	43.5	36.1										I	54	32	12	31.8	4	0.6
L19	III	82	6	55	1	41.25	33.8										I	46	26	7.8	30.2	4	1
L20	III	87	6	54	1	40.5	36.7										I	42	32	12	30.9	4	0.9
L22	III	92	6	57	1	42.75	39.7										I	53	30	11.25	31.2	5	0.8
L24	III	85	6	53	1	39.75	33.8										I	54	28	10.5	28.3	5	0.7
L25	III	75	5	59	1	44.25	36.8										I	52	28	14.7	31.4	4	0.8
L26	III	76	5	49	0.9	33.075	35.4										I	52	30	11.25	31.5	5	0.65
L30	I	54	4	32	0.5	12	31.8										I	64	39	20.475	30.9	4	0.7
L32	I	46	3	26	0.4	7.8	30.2										I	60	33	19.8	35.9	4	0.8
L34	I	42	3	32	0.5	12	30.9										I	46	36	18.9	32.9	4	0.9
L35	I	53	4	30	0.5	11.25	31.2										I	50	28.5	12.825	30.8	6	0.9
L36	I	54	4	28	0.5	10.5	28.3										I	56	32.5	12.1875	34.4	5	0.9
L37	I	52	4	28	0.7	14.7	31.4										II	70	35	15.75	39.1	5	0.8
L38	I	52	4	30	0.5	11.25	31.5										II	65	50	37.5	37	6	0.9
L39	I	64	6	39	0.7	20.475	30.9										II	71	48	32.4	37.8	5	1
L40	I	60	5	33	0.8	19.8	35.9										II	63	43	25.8	40.9	6	1
L41	I	46	4	36	0.7	18.9	32.9										II	58	43	22.575	39.2	6	1
L42	I	50	4	28.5	0.6	12.825	30.8										II	60	44	26.4	39.7	6	1
L44	I	56	4	32.5	0.5	12.1875	34.4										II	71	45	21.9375	37.1	6	1
																	II	68	40	21	38.2	6	1
																	II	65	49	29.4	39.1	5	1
																	II	66	52	35.1	40.3	5	0.9
																	III	80	50	33.75	34.9	4	0.5
																	III	77	51	34.425	41.2	3	0.4
																	III	77	52	31.2	32.9	3	0.5
																	III	78	50	33.75	35.7	4	0.5
																	III	79	55	41.25	35.6	4	0.5
																	III	83	58	43.5	36.1	4	0.7
																	III	82	55	41.25	33.8	4	0.5
																	III	87	54	40.5	36.7	6	0.7
																	III	92	57	42.75	39.7	5	0.8
																	III	85	53	39.75	33.8	4	0.7
																	III	75	59	44.25	36.8	4	0.6
																	III	76	49	33.075	35.4	4	0.5
